# Supplementary material for: Consequences of the COVID-19 Pandemic and Governmental Containment Policies on the Detection and Therapy of Oral Malignant Lesions—A Retrospective, Multicenter Cohort Study from Germany
Source: MDPI journal article supplement (doi:10.3390/cancers13122892), 2021-06-09
Supplement: s1 [file s1]

Table S1. TNM classification. Distribution of data from the multicenter analysis.

| Period |     | T1 | T2  |     | T3  |     | T4  |     | Total |       |
|--------|-----|----|-----|-----|-----|-----|-----|-----|-------|-------|
| LD     |     | 26 | 23  |     | 12  |     | 16  |     | 77    |       |
| PLD    |     | 43 | 34  |     | 25  |     | 26  |     | 128   |       |
| LD-Ä   |     | 50 | 42  |     | 25  |     | 33  |     | 151   |       |
| PLD-Ä  |     | 77 | 61  |     | 47  |     | 88  |     | 274   |       |
| Period | No  | N1 | N2a | N2b | N2c | N2  | N3a | N3b | N3    | Total |
| LD     | 45  | 7  | 1   | 7   | 1   | 4   | 0   | 6   | 0     | 71    |
| PLD    | 83  | 15 | 2   | 3   | 3   | 3   | 0   | 10  | 1     | 120   |
| LD-Ä   | 101 | 6  | 2   | 8   | 8   | 4   | 1   | 7   | 1     | 138   |
| PLD-Ä  | 157 | 32 | 5   | 13  | 9   | 21  | 0   | 25  | 1     | 263   |
| Period |     |    | Mo  |     |     | M1  |     |     | Total |       |
| LD     |     |    | 57  |     |     | 0   |     |     | 57    |       |
| PLD    |     |    | 90  |     |     | 9   |     |     | 99    |       |
| LD-Ä   |     |    | 122 |     |     | 9   |     |     | 131   |       |
| PLD-Ä  |     |    | 236 |     |     | 10  |     |     | 246   |       |
| Period |     | Go |     | G1  |     | G2  |     | G3  |       | Total |
| LD     |     | 1  |     | 19  |     | 47  |     | 10  |       | 77    |
| PLD    |     | 1  |     | 18  |     | 79  |     | 25  |       | 123   |
| LD-Ä   |     | 6  |     | 23  |     | 87  |     | 25  |       | 141   |
| PLD-Ä  |     | 11 |     | 40  |     | 149 |     | 55  |       | 255   |
| Period |     |    | Ro  |     |     | R1  |     |     | Total |       |
| LD     |     |    | 58  |     |     | 2   |     |     | 60    |       |
| PLD    |     |    | 105 |     |     | 6   |     |     | 11    |       |
| LD-Ä   |     |    | 118 |     |     | 12  |     |     | 130   |       |
| PLD-Ä  |     |    | 193 |     |     | 22  |     |     | 215   |       |
| Period |     |    | Lo  |     |     | L1  |     |     | Total |       |
| LD     |     |    | 53  |     |     | 7   |     |     | 60    |       |
| PLD    |     |    | 102 |     |     | 11  |     |     | 113   |       |
| LD-Ä   |     |    | 121 |     |     | 9   |     |     | 130   |       |
| PLD-Ä  |     |    | 198 |     |     | 17  |     |     | 215   |       |
| Period |     |    | Vo  |     |     | V1  |     |     | Total |       |
| LD     |     |    | 56  |     |     | 4   |     |     | 60    |       |
| PLD    |     |    | 109 |     |     | 4   |     |     | 113   |       |
| LD-Ä   |     |    | 126 |     |     | 2   |     |     | 128   |       |
| PLD-Ä  |     |    | 208 |     |     | 4   |     |     | 212   |       |
| Period |     |    | Pno |     |     | Pn1 |     |     | Total |       |
| LD     |     |    | 48  |     |     | 12  |     |     | 60    |       |

|       |     |    |     |
|-------|-----|----|-----|
| PLD   | 93  | 21 | 114 |
| LD-Ä  | 113 | 15 | 128 |
| PLD-Ä | 175 | 33 | 208 |

Table S2. UICC-Classification. Multicenter analysis.

| Period | UICC<br>0 | UICC<br>I | UICC<br>II | UICC<br>III | UICC<br>IVA | UICC<br>IVB | UICC<br>IVC | Total |
|--------|-----------|-----------|------------|-------------|-------------|-------------|-------------|-------|
| LD     | 0         | 20        | 15         | 13          | 19          | 6           | 0           | 73    |
| PLD    | 1         | 40        | 22         | 22          | 24          | 10          | 7           | 126   |
| LD-Ä   | 0         | 45        | 32         | 20          | 38          | 7           | 7           | 149   |
| PLD-Ä  | 0         | 70        | 39         | 38          | 80          | 34          | 6           | 267   |

Table S3. Distribution of different treatment modalities. Multicenter analysis.

| Period | Surgery | Radiation | Radiation<br>& Chemo | Immunothera<br>py | Palliative<br>Treatment | Total |
|--------|---------|-----------|----------------------|-------------------|-------------------------|-------|
| LD     | 63      | 6         | 3                    | 1                 | 5                       | 78    |
| PLD    | 118     | 3         | 2                    | 4                 | 7                       | 134   |
| LD-Ä   | 133     | 0         | 11                   | 3                 | 13                      | 160   |
| PLD-Ä  | 225     | 5         | 35                   | 0                 | 15                      | 280   |

Table S4: Distribution of different diagnosis modalities. Multicenter analysis.

| Period | Internal<br>Diagnosis | External<br>Diagnosis | Total |
|--------|-----------------------|-----------------------|-------|
| LD     | 59                    | 19                    | 78    |
| PLD    | 86                    | 49                    | 135   |
| LD-Ä   | 112                   | 48                    | 160   |
| PLD-Ä  | 203                   | 77                    | 280   |

Table S5: Diagnosis code distribution.

| Period | Co1 | Co2<br>.0 | Co2<br>.1 | C<br>o2<br>.8 | C<br>o3<br>.0 | C<br>o3<br>.1 | C<br>o4<br>.0 | C<br>o4<br>.1 | C<br>o4<br>.8 | C<br>o4<br>.9 | Co5<br>.0 | C<br>o5<br>.8 | Co6<br>.0 | C1<br>o.<br>8 | C<br>o5<br>.1 | C<br>o9<br>.0 | Co9<br>.1 |
|--------|-----|-----------|-----------|---------------|---------------|---------------|---------------|---------------|---------------|---------------|-----------|---------------|-----------|---------------|---------------|---------------|-----------|
| LD     | 1   | 1         | 15        | 3             | 3             | 12            | 11            | 1             | 4             | 2             | 4         | 3             | 9         | 1             | 7             | 0             | 0         |
| PLD    | 6   | 0         | 26        | 1             | 4             | 28            | 16            | 8             | 13            | 3             | 5         | 2             | 14        | 1             | 6             | 0             | 1         |
| LD-Ä   | 2   | 2         | 44        | 6             | 9             | 30            | 13            | 5             | 6             | 0             | 8         | 1             | 14        | 6             | 10            | 3             | 1         |
| PLD-Ä  | 13  | 4         | 47        | 10            | 18            | 55            | 21            | 13            | 17            | 5             | 12        | 9             | 34        | 9             | 6             | 2             | 5         |

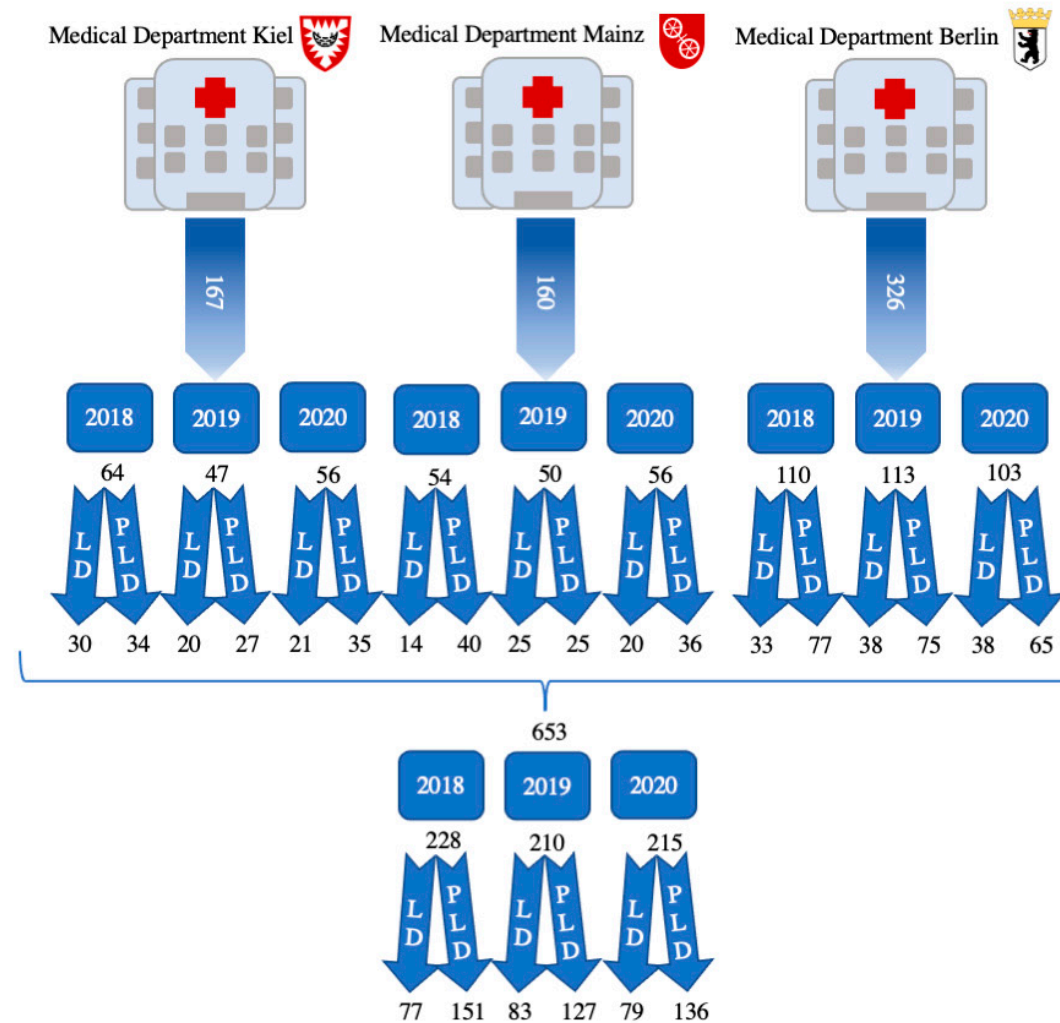

Figure S1. Flowchart. Flow of the data of different medical departments into the analysis.
